# Supplementary material for: High-efficiency water oxidation and energy storage utilizing various reversible redox mediators under visible light over surface-modified WO3
Source: Royal Society of Chemistry journal article supplement (doi:10.1039/c3ra47772j), 2014-01-01
Supplement: c3ra47772j.pdf [file c3ra47772j.pdf]

## Electronic Supplementary Information

### **High-efficiency water oxidation and energy storage utilizing various reversible redox mediators under visible light over surface-modified WO<sub>3</sub>**

Yugo Miseki\* and Kazuhiro Sayama\*

*Energy Technology Research Institute, National Institute of Advanced Industrial  
Science and Technology (AIST), Central 5, 1-1-1 Higashi, Tsukuba, Ibaraki 305-  
8565. Fax: +81-29-861-4760; Tel: +81-29-861-4760; E-mail: yugo-  
miseki@aist.go.jp, k.sayama@aist.go.jp.*

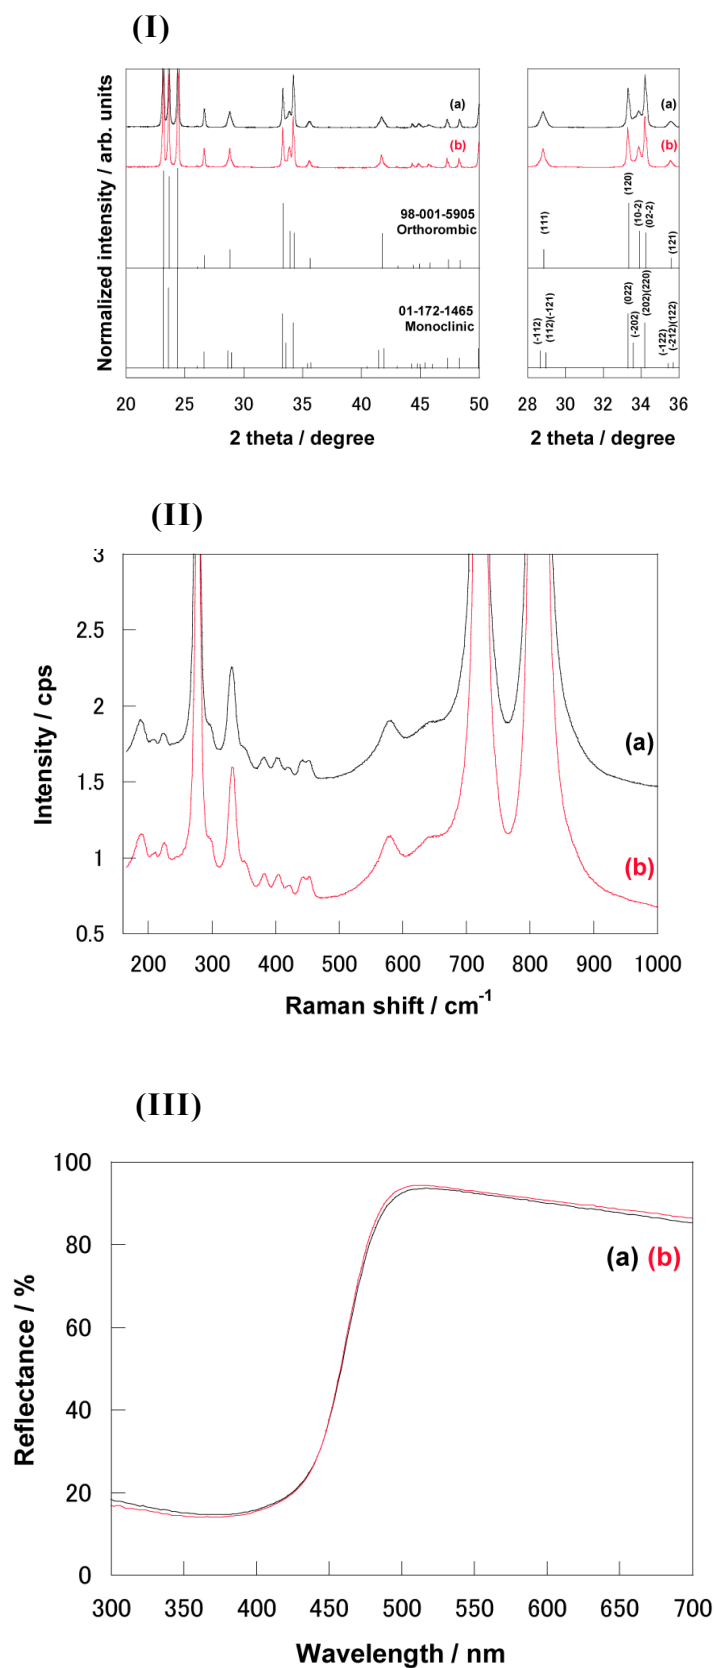

**Figure S1** (I) XRD patterns, (II) Raman spectra, and (III) reflectance spectra of (a)  $\text{WO}_3$  and (b)  $\text{Cs-WO}_3$ .

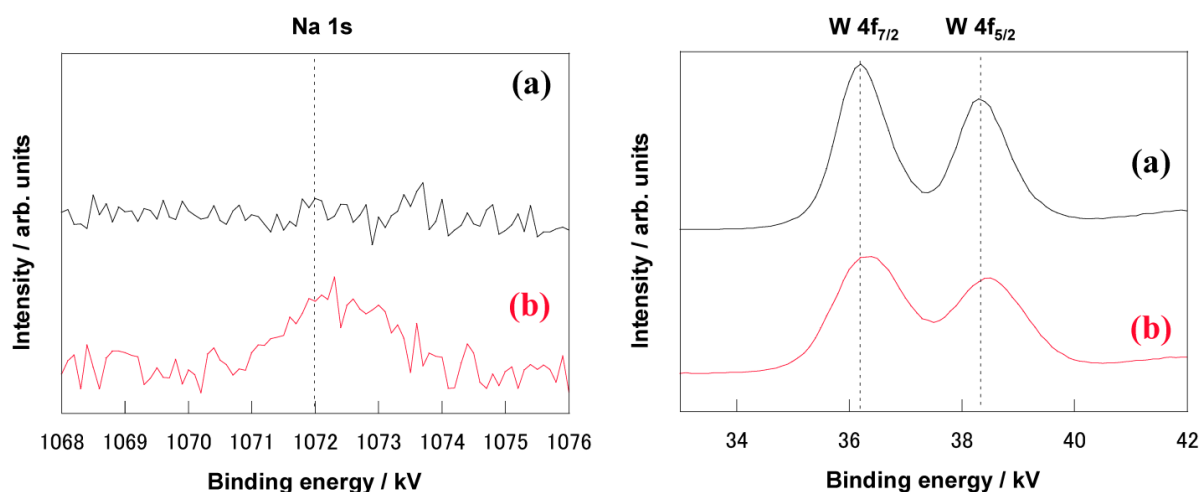

**Figure S2** XPS spectra of (a)  $\text{WO}_3$  and (b)  $\text{Cs-WO}_3$  after stirring treatment in 1M NaCl solution.

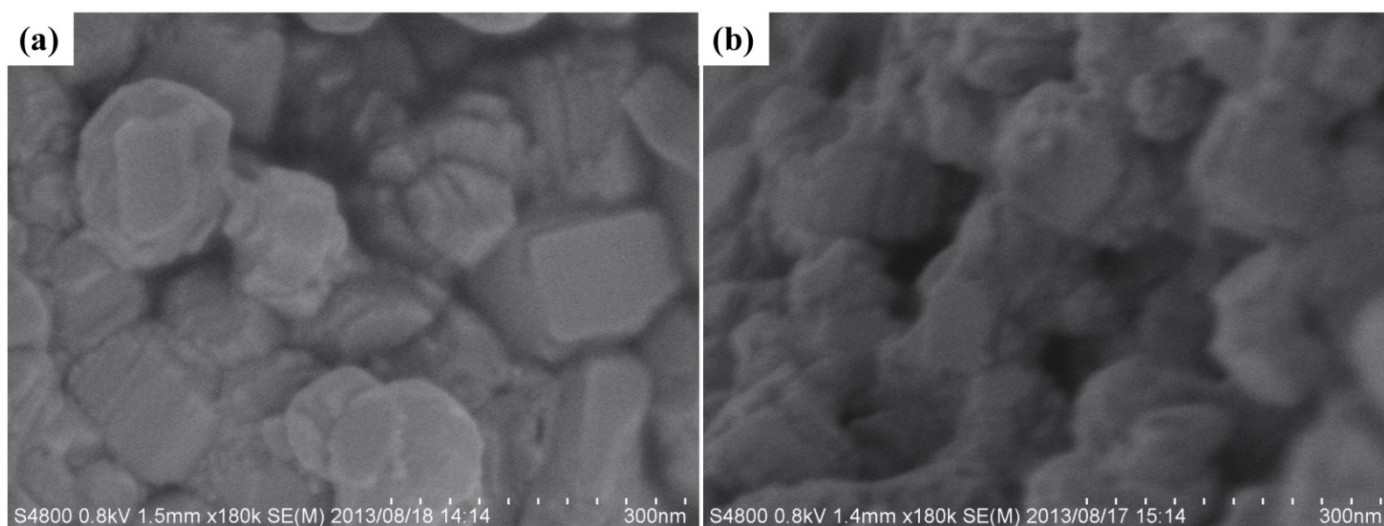

**Figure S3** SEM images of  $\text{H-Cs-WO}_3$  (a) with and (b) without thermal treatment at 673 K for 30 min.

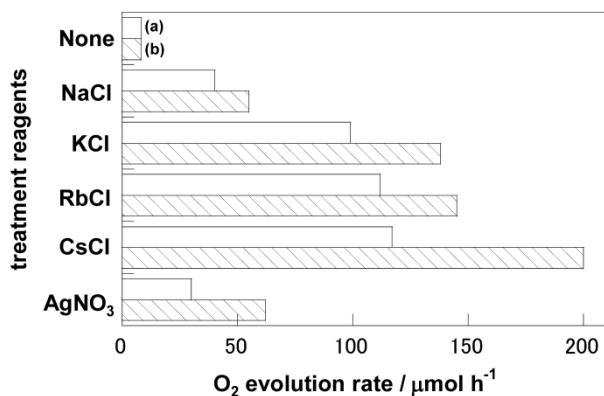

**Figure S4** Reaction rates for water oxidation over  $\text{WO}_3$  photocatalysts treated with various metal salt solutions. Stirring treatment was conducted with (a) water and (b)  $\text{FeSO}_4$  solution.
